# Supplementary material for: Impact of immunosuppressive therapy on SARS-CoV-2 mRNA vaccine effectiveness in patients with immune-mediated inflammatory diseases: a Danish nationwide cohort study
Source: PubMed Central journal article supplement (PMC10882296; doi:10.1136/bmjopen-2023-077408), 2024-02-21

## The Impact of Immunosuppressive Therapy on SARS-CoV-2 mRNA Vaccine Effectiveness in Patients with Immune-mediated Inflammatory Diseases: A Danish Nationwide Cohort Study

Rahma Elmahdi<sup>\*1,2</sup> (0000-0002-7013-9548), Daniel Ward<sup>\*1</sup> (0000-0003-0405-7250), Martin Thomsen Ernst<sup>3</sup> (0000-0001-9003-3823), Gry Juul Poulsen<sup>1</sup> (0000-0003-2744-2469), Jesper Hallas<sup>3</sup> (0000-0002-8097-8708), Anton Pottegård<sup>3</sup> (0000-0001-9314-5679), Tine Jess<sup>1,4</sup> (0000-0002-4391-7332)

### SUPPLEMENTARY TABLES

**Supplementary Table 1. Exposures and corresponding ATC and procedure codes for immunosuppressives**

| Medication                            | ATC code | Procedure code |
|---------------------------------------|----------|----------------|
| <b>Selective immunosuppressants</b>   |          |                |
| Muromonab-CD3                         | L04AA02  |                |
| Antilymphocyte immunoglobulin (horse) | L04AA03  |                |
|                                       | L04AA04  | BOHJ12         |
| Antithymocyte immunoglobulin (rabbit) | L04AA06  | BOHJ22         |
| Mycophenolic acid                     | L04AA10  | BOHJ23         |
| Sirolimus                             | L04AA13  |                |
| Leflunomide                           | L04AA18  | BOHJ24         |
| Everolimus                            | L04AA23  | BOHJ26         |
| Natalizumab                           | L04AA24  | BOHJ18C1       |
| Abatacept                             | L04AA25  | BWHB84         |
| Eculizumab                            | L04AA26  | BOHJ19H6       |
| Belimumab                             | L04AA27  | BOHJ27         |
| Fingolimod                            | L04AA28  |                |
| Belatacept                            | L04AA29  | BOHJ28D        |
| Tofacitinib                           | L04AA31  | BOHJ28A        |
| Teriflunomide                         | L04AA32  |                |
| Aprelimast                            | L04AA33  | BOHJ19H4       |
| Vedolizumab                           | L04AA34  | BOHJ16A        |
| Alemtuzumab                           | L04AA36  |                |
| Ocrelizumab                           | L04AA37  |                |
| Baricitinib                           | L04AA38  |                |
| Ozanimod                              | L04AA39  |                |
| Emapalumab                            | L04AA40  | BWHA178        |
| Cladribine                            | L04AA41  |                |
| Imlifidase                            | L04AA42  | BWHB87         |
| Siponimod                             | L04AA43  |                |
| Ravulizumab                           | L04AA44  |                |
| Upadacitinib                          |          |                |

|                                          |         |          |
|------------------------------------------|---------|----------|
| <b>Tumour necrosis factor inhibitors</b> |         |          |
| Etanercept                               | L04AB01 | BOHJ18A2 |
| Infliximab                               | L04AB02 | BOHJ18A1 |
| Adalimumab                               | L04AB04 | BOHJ18A3 |
| Certolizumab pegol                       | L04AB05 | BOHJ18A5 |
| Golimumab                                | L04AB06 | BOHJ18A4 |
| <b>Interleukin inhibitors</b>            |         |          |
| Basiliximab                              | L04AC02 |          |
| Anakinra                                 | L04AC03 | BOHJ18B1 |
| Ustekinumab                              | L04AC05 | BOHJ18B3 |
| Tocilizumab                              | L04AC07 | BOHJ18B2 |
| Canakinumab                              | L04AC08 | BOHJ18B4 |
| Secukinumab                              | L04AC10 | BOHJ18B5 |
| Siltuximab                               | L04AC11 |          |
| Brodalumab                               | L04AC12 | BOHJ18B6 |
| Ixekizumab                               | L04AC13 |          |
| Sarilumab                                | L04AC14 | BOHJ18B9 |
| Guselkumab                               | L04AC16 |          |
| Tildrakizumab                            | L04AC17 | BOHJ18B7 |
| Risankizumab                             | L04AC18 | BOHJ19N1 |
| <b>Calcineurin inhibitors</b>            |         |          |
| Ciclosporin                              | L04AD01 | BOHJ20   |
| Tacrolimus                               | L04AD02 | BOHJ21   |
| <b>Other immunosuppressants</b>          |         |          |
| Azathioprine                             | L04AX01 | BWHB83   |
| Thalidomide                              | L04AX02 | BWHB81   |
| Methotrexate                             | L04AX03 | BWHA115  |
| Lenalidomide                             | L04AX04 | BWHB82   |
| Pirfenidone                              | L04AX05 | BWHB85   |
| Pomalidomide                             | L04AX06 | BWHB86   |
| Dimethyl fumarate                        | L04AX07 | BOHJ28B  |
| Darvadstrocel                            | L04AX08 |          |
| <b>Systemic corticosteroids</b>          | H02AB   |          |
| <b>Rituximab</b>                         | L01XC02 |          |

**Supplementary Table 2. Minimum daily dose of corticosteroid in exposed persons**

| <b>Compound</b>    | <b>Equivalent dose</b> |
|--------------------|------------------------|
| Cortisone          | 38mg                   |
| Hydrocortisone     | 30mg                   |
| Prednisone         | 7.5mg                  |
| Prednisolone       | 7.5mg                  |
| Triamcinolone      | 6mg                    |
| Methylprednisolone | 6mg                    |
| Betamethasone      | 0.9mg                  |
| Dexamethasone      | 1.2mg                  |

**Supplementary Table 3. Covariates by disease cohort**

| IBD COHORT                                                           |                                 |                                |
|----------------------------------------------------------------------|---------------------------------|--------------------------------|
| Covariate                                                            | Categories/<br>ATC/ICD<br>codes | Assessment window              |
| Age                                                                  | -                               | At cohort entry                |
| Sex                                                                  | -                               | At cohort entry                |
| SARS-CoV-2 tests in the previous month                               | -                               | At cohort entry                |
| Ever previous SARS-CoV-2 positive test                               | -                               | From February 2020             |
| IBD specific covariates                                              |                                 |                                |
| Any IBD-related hospital admissions in the previous year             | K50/K51                         | 1 year before cohort entry     |
| Crohn's disease                                                      | K50                             | At cohort entry                |
| Ulcerative colitis                                                   | K51                             | At cohort entry                |
| 5-ASA/sulfasalazine                                                  | MA07EC0                         | 1 year before matching date    |
| Budesonide                                                           | MA07EA06                        | 3 months before matching date  |
| IBD related procedures                                               |                                 | Any time before cohort entry   |
| Operations of the small bowel and colon                              | KJF                             |                                |
| Operations of the rectum                                             | KJG                             |                                |
| Operations of the anus and perianal tissue                           | KJH                             |                                |
| Operational of the abdominal wall, peritoneum, mesentery and omentum | KJA                             |                                |
| Lysis of adhesion in the abdominal cavity                            | KJAP                            |                                |
| Closure of intestinovaginal fistula                                  | KLEE30                          |                                |
| Closure of vesiculointestinal fistula                                | KKCH30                          |                                |
| Endoscopy of the gastrointestinal tract                              | KUJ                             | 1 year before the cohort entry |
| Comorbidities                                                        |                                 |                                |
| Cardiovascular disease                                               | DI1-I7                          | Any time before cohort entry   |
| Pulmonary disease                                                    |                                 | Any time before cohort entry   |
| Chronic disease of the lower airways                                 | DJ4                             |                                |
| Other interstitial lung disease                                      | DJ84                            |                                |
| Diseases with pus and necrosis in the lower airway                   | DJ85                            |                                |
| Interstitial lung emphysema                                          | DJ982                           |                                |
| compensatory emphysema                                               | DJ983                           |                                |
| Liver disease                                                        | DK70-K77                        | Any time before cohort entry   |
| Kidney disease                                                       |                                 | Any time before cohort entry   |
| Glomerular disease                                                   | DN0                             |                                |
| Tubulointerstitial kidney disease and kidney insufficiency           | DN1                             |                                |
| Other gastrointestinal diseases                                      |                                 | Any time before cohort entry   |
| Gingivitis and periodontal disease                                   | DK05                            |                                |
| Inflammation of the oral mucosa and related                          | DK12                            |                                |
| Stomach and duodenal ulcers                                          | DK25-27                         |                                |
| Fissure and rifts in and around the anus                             | DK60                            |                                |
| Abscess in and around the anus                                       | DK61                            |                                |
| Other diseases of the rectum and anus                                | DK62                            |                                |
| Other bowel disease                                                  | DK63                            |                                |

|                                                                                                                                                                                                                                                                                                                                                                                                                                                                                                                                                                                                                                                                                                                                                                                                                                                                                                                                        |                                                                                                                                                         |                              |
|----------------------------------------------------------------------------------------------------------------------------------------------------------------------------------------------------------------------------------------------------------------------------------------------------------------------------------------------------------------------------------------------------------------------------------------------------------------------------------------------------------------------------------------------------------------------------------------------------------------------------------------------------------------------------------------------------------------------------------------------------------------------------------------------------------------------------------------------------------------------------------------------------------------------------------------|---------------------------------------------------------------------------------------------------------------------------------------------------------|------------------------------|
| Skin disease<br>Bullous skin disease<br>Dermatitis and eczema<br>Alopecia areata<br>Vitiligo<br>Granulomatous disease in the skin and subcutaneous tissue<br>Lupus<br>Other localised connective tissue disease<br>Vasculitis limited to the skin                                                                                                                                                                                                                                                                                                                                                                                                                                                                                                                                                                                                                                                                                      | DL10-14<br>DL20-30<br>DL63<br>DL80<br>DL92<br>DL93<br>DL94<br>DL95                                                                                      | Any time before cohort entry |
| Musculoskeletal disease<br>Generalised connective tissue diseases<br>Diseases of the muscles<br>Soft-tissue rheumatism                                                                                                                                                                                                                                                                                                                                                                                                                                                                                                                                                                                                                                                                                                                                                                                                                 | DM30-<br>DM36<br>DM60-63<br>DM70-79                                                                                                                     | Any time before cohort entry |
| <b>Medications</b>                                                                                                                                                                                                                                                                                                                                                                                                                                                                                                                                                                                                                                                                                                                                                                                                                                                                                                                     |                                                                                                                                                         |                              |
| Cardiovascular drugs                                                                                                                                                                                                                                                                                                                                                                                                                                                                                                                                                                                                                                                                                                                                                                                                                                                                                                                   | MC01-MC10                                                                                                                                               | Any time before cohort entry |
| Antibiotics                                                                                                                                                                                                                                                                                                                                                                                                                                                                                                                                                                                                                                                                                                                                                                                                                                                                                                                            | MJ01                                                                                                                                                    | Any time before cohort entry |
| Oral anticoagulants                                                                                                                                                                                                                                                                                                                                                                                                                                                                                                                                                                                                                                                                                                                                                                                                                                                                                                                    | MB01AA<br>MB01AF                                                                                                                                        | Any time before cohort entry |
| Drugs used in diabetes                                                                                                                                                                                                                                                                                                                                                                                                                                                                                                                                                                                                                                                                                                                                                                                                                                                                                                                 | MA10                                                                                                                                                    | Any time before cohort entry |
| Drugs for obstructive airway diseases                                                                                                                                                                                                                                                                                                                                                                                                                                                                                                                                                                                                                                                                                                                                                                                                                                                                                                  | MR03                                                                                                                                                    | Any time before cohort entry |
| <b>INFLAMMATORY ARTHROPATHIES COHORT</b>                                                                                                                                                                                                                                                                                                                                                                                                                                                                                                                                                                                                                                                                                                                                                                                                                                                                                               |                                                                                                                                                         |                              |
| Age                                                                                                                                                                                                                                                                                                                                                                                                                                                                                                                                                                                                                                                                                                                                                                                                                                                                                                                                    | -                                                                                                                                                       | At cohort entry              |
| Sex                                                                                                                                                                                                                                                                                                                                                                                                                                                                                                                                                                                                                                                                                                                                                                                                                                                                                                                                    | -                                                                                                                                                       | At cohort entry              |
| SARS-CoV-2 tests in the previous month                                                                                                                                                                                                                                                                                                                                                                                                                                                                                                                                                                                                                                                                                                                                                                                                                                                                                                 | -                                                                                                                                                       | At cohort entry              |
| <b>Arthropathy-specific covariates</b>                                                                                                                                                                                                                                                                                                                                                                                                                                                                                                                                                                                                                                                                                                                                                                                                                                                                                                 |                                                                                                                                                         |                              |
| Arthropathy-related procedures<br>Shoulder and upper arm<br>Primary insertion of joint prosthesis<br>Secondary insertion of joint prosthesis<br>Operations on the joint capsule and ligaments<br>Operations of the synovia and joint surface<br>Joint resections, arthroplasties, and arthrodesis<br>Excision of bursa<br>Elbow and lower arm<br>Primary insertion of joint prosthesis<br>Secondary insertion of joint prosthesis<br>Operations on the joint capsule and ligaments<br>Operations of the synovia and joint surface<br>Joint resections, arthroplasties, and arthrodesis<br>Excision of bursa<br>Wrist and hand<br>Primary insertion of joint prosthesis<br>Secondary insertion of joint prosthesis<br>Operations on the joint capsule and ligaments<br>Operations of the synovia and joint surface<br>Joint resections, arthroplasties, and arthrodesis<br>Operations on the fascia, tendon sheaths, ganglia and bursae | KNBB<br>KNBC<br>KNBE<br>KNBF<br>KNBG<br>KBM79<br><br>KNCB<br>KNCC<br>KNCE<br>KNCF<br>KNCG<br>KNCM79<br><br>KNDB<br>KNDC<br>KNDE<br>KNDF<br>KNDG<br>KNDM | Any time before cohort entry |

|                                                                                                                                                                                                                                                                                                                                                                                                                                                                                                                                                                                                                                                                                                                                                                                                                                                                                                                                                                           |                                                                                                                                                                                                       |                                                 |
|---------------------------------------------------------------------------------------------------------------------------------------------------------------------------------------------------------------------------------------------------------------------------------------------------------------------------------------------------------------------------------------------------------------------------------------------------------------------------------------------------------------------------------------------------------------------------------------------------------------------------------------------------------------------------------------------------------------------------------------------------------------------------------------------------------------------------------------------------------------------------------------------------------------------------------------------------------------------------|-------------------------------------------------------------------------------------------------------------------------------------------------------------------------------------------------------|-------------------------------------------------|
| <p>Hip and thigh<br/> Primary insertion of joint prosthesis<br/> Secondary insertion of joint prosthesis<br/> Operations on the joint capsule and ligaments<br/> Operations of the synovia and joint surface<br/> Joint resections, arthroplasties, and arthrodesis<br/> Excision of bursa in the<br/> Knee and lower leg<br/> Primary insertion of joint prosthesis<br/> Secondary insertion of joint prosthesis<br/> Operations on the joint capsule and ligaments<br/> Operations of the synovia and joint surface<br/> Joint resections, arthroplasties, and arthrodesis<br/> Excision of bursae<br/> Ankle and foot<br/>     Primary insertion of joint prosthesis<br/>     Secondary insertion of joint prosthesis<br/>     Operations on the joint capsule and ligaments<br/>     Operations of the synovia and joint surface<br/>     Joint resections, arthroplasties, and arthrodesis<br/>     Operations on the fascia, tendon sheaths, ganglia and bursae</p> | <p>KNFB<br/> KNFC<br/> KNFE<br/> KNFF<br/> KNFG<br/> KNFM79<br/> <br/> KNGB<br/> KNGC<br/> KNGE<br/> KNGF<br/> KNGG<br/> KNGM79<br/> <br/> KNHB<br/> KNHC<br/> KNHE<br/> KNHF<br/> KNHG<br/> KNHM</p> |                                                 |
| <p>Anti-inflammatory and anti-rheumatic drugs<br/> inc. specific anti-rheumatic therapies, non-steroidals, and combination medications<br/> Hydroxychloroquine</p>                                                                                                                                                                                                                                                                                                                                                                                                                                                                                                                                                                                                                                                                                                                                                                                                        | <p>M01<br/> P01BA02</p>                                                                                                                                                                               | <p>3 months before<br/> before cohort entry</p> |
| <b>Comorbidities</b>                                                                                                                                                                                                                                                                                                                                                                                                                                                                                                                                                                                                                                                                                                                                                                                                                                                                                                                                                      |                                                                                                                                                                                                       |                                                 |
| <p>Cardiovascular disease</p>                                                                                                                                                                                                                                                                                                                                                                                                                                                                                                                                                                                                                                                                                                                                                                                                                                                                                                                                             | <p>DI1-I7</p>                                                                                                                                                                                         | <p>Any time before<br/> cohort entry</p>        |
| <p>Pulmonary disease<br/> Chronic disease of the lower airways<br/> Other interstitial lung disease<br/> Diseases with pus and necrosis in the lower airway<br/> Interstitial lung emphysema<br/> compensatory emphysema</p>                                                                                                                                                                                                                                                                                                                                                                                                                                                                                                                                                                                                                                                                                                                                              | <p>DJ4<br/> DJ84<br/> DJ85<br/> DJ982<br/> DJ983</p>                                                                                                                                                  | <p>Any time before<br/> cohort entry</p>        |
| <p>Liver disease</p>                                                                                                                                                                                                                                                                                                                                                                                                                                                                                                                                                                                                                                                                                                                                                                                                                                                                                                                                                      | <p>DK70-K77</p>                                                                                                                                                                                       | <p>Any time before<br/> cohort entry</p>        |
| <p>Kidney disease<br/> Glomerular disease<br/> Tubulointerstitial kidney disease and kidney insufficiency</p>                                                                                                                                                                                                                                                                                                                                                                                                                                                                                                                                                                                                                                                                                                                                                                                                                                                             | <p>DN0<br/> DN1</p>                                                                                                                                                                                   | <p>Any time before<br/> cohort entry</p>        |
| <p>Other gastrointestinal diseases<br/> Gingivitis and periodontal disease<br/> Inflammation of the oral mucosa and related<br/> Stomach and duodenal ulcers<br/> Fissure and rifts in and around the anus<br/> Abscess in and around the anus<br/> Other diseases of the rectum and anus<br/> Other bowel disease</p>                                                                                                                                                                                                                                                                                                                                                                                                                                                                                                                                                                                                                                                    | <p>DK05<br/> DK12<br/> DK25-27<br/> DK60<br/> DK61<br/> DK62<br/> DK63</p>                                                                                                                            | <p>Any time before<br/> cohort entry</p>        |
| <p>Skin disease<br/> Bullous skin disease<br/> Dermatitis and eczema<br/> Alopecia areata</p>                                                                                                                                                                                                                                                                                                                                                                                                                                                                                                                                                                                                                                                                                                                                                                                                                                                                             | <p>DL10-14<br/> DL20-30<br/> DL63</p>                                                                                                                                                                 | <p>Any time before<br/> cohort entry</p>        |

|                                                                                                                                                                                                             |                                       |                              |
|-------------------------------------------------------------------------------------------------------------------------------------------------------------------------------------------------------------|---------------------------------------|------------------------------|
| Vitiligo<br>Granulomatous disease in the skin and subcutaneous tissue<br>Lupus<br>Other localised connective tissue disease<br>Vasculitis limited to the skin                                               | DL80<br>DL92<br>DL93<br>DL94<br>DL95  |                              |
| Musculoskeletal disease<br>Generalised connective tissue diseases<br>Diseases of the muscles<br>Soft-tissue rheumatism                                                                                      | DM30-<br>DM36<br>DM60-63<br>DM70-79   | Any time before cohort entry |
| <b>Medications</b>                                                                                                                                                                                          |                                       |                              |
| Cardiovascular drugs                                                                                                                                                                                        | MC01-MC10                             | Any time before cohort entry |
| Antibiotics                                                                                                                                                                                                 | MJ01                                  | Any time before cohort entry |
| Oral anticoagulants                                                                                                                                                                                         | MB01AA<br>MB01AF                      | Any time before cohort entry |
| Drugs used in diabetes                                                                                                                                                                                      | MA10                                  | Any time before cohort entry |
| Drugs for obstructive airway diseases                                                                                                                                                                       | MR03                                  | Any time before cohort entry |
| <b>PSORIASIS COHORT</b>                                                                                                                                                                                     |                                       |                              |
| Age                                                                                                                                                                                                         | -                                     | At cohort entry              |
| Sex                                                                                                                                                                                                         | -                                     | At cohort entry              |
| SARS-CoV-2 tests in the previous month                                                                                                                                                                      | -                                     | At cohort entry              |
| <b>Psoriasis-specific covariates</b>                                                                                                                                                                        |                                       |                              |
| Procedures<br>Ultraviolet therapy: UV-A with psoralen/broad-spectrum UVB / narrow-spectrum UVB                                                                                                              | BNGA1/<br>BNGA2/<br>BNGA3             | Any time before cohort entry |
| Therapeutic steroid injection in the joints and soft tissues                                                                                                                                                | BLHN0                                 | Any time before cohort entry |
| 5-ASA/sulfasalazine                                                                                                                                                                                         | A07EC0                                | 1 year before cohort entry   |
| Topical corticosteroids                                                                                                                                                                                     | D07                                   | 1 year before cohort entry   |
| Antipsoriatic medication                                                                                                                                                                                    | D05                                   | 1 year before cohort entry   |
| Topical calcineurin inhibitors                                                                                                                                                                              | D11AH01-02,                           | 1 year before cohort entry   |
| <b>Comorbidities</b>                                                                                                                                                                                        |                                       |                              |
| Cardiovascular disease                                                                                                                                                                                      | DI1-I7                                | Any time before cohort entry |
| Pulmonary disease<br>Chronic disease of the lower airways<br>Other interstitial lung disease<br>Diseases with pus and necrosis in the lower airway<br>Interstitial lung emphysema<br>compensatory emphysema | DJ4<br>DJ84<br>DJ85<br>DJ982<br>DJ983 | Any time before cohort entry |

|                                                                                                                                                                                                                                                                                                   |                                                                    |                              |
|---------------------------------------------------------------------------------------------------------------------------------------------------------------------------------------------------------------------------------------------------------------------------------------------------|--------------------------------------------------------------------|------------------------------|
| Liver disease                                                                                                                                                                                                                                                                                     | DK70-K77                                                           | Any time before cohort entry |
| Kidney disease<br>Glomerular disease<br>Tubulointerstitial kidney disease and kidney insufficiency                                                                                                                                                                                                | DN0<br>DN1                                                         | Any time before cohort entry |
| Other gastrointestinal diseases<br>Gingivitis and periodontal disease<br>Inflammation of the oral mucosa and related<br>Stomach and duodenal ulcers<br>Fissure and rifts in and around the anus<br>Abscess in and around the anus<br>Other diseases of the rectum and anus<br>Other bowel disease | DK05<br>DK12<br>DK25-27<br>DK60<br>DK61<br>DK62<br>DK63            | Any time before cohort entry |
| Skin disease<br>Bullous skin disease<br>Dermatitis and eczema<br>Alopecia areata<br>Vitiligo<br>Granulomatous disease in the skin and subcutaneous tissue<br>Lupus<br>Other localised connective tissue disease<br>Vasculitis limited to the skin                                                 | DL10-14<br>DL20-30<br>DL63<br>DL80<br>DL92<br>DL93<br>DL94<br>DL95 | Any time before cohort entry |
| Musculoskeletal disease<br>Generalised connective tissue diseases<br>Diseases of the muscles<br>Soft-tissue rheumatism                                                                                                                                                                            | DM30-<br>DM36<br>DM60-63<br>DM70-79                                | Any time before cohort entry |
| <b>Medications</b>                                                                                                                                                                                                                                                                                |                                                                    |                              |
| Cardiovascular drugs                                                                                                                                                                                                                                                                              | MC01-MC10                                                          | Any time before cohort entry |
| Antibiotics                                                                                                                                                                                                                                                                                       | MJ01                                                               | Any time before cohort entry |
| Oral anticoagulants                                                                                                                                                                                                                                                                               | MB01AA<br>MB01AF                                                   | Any time before cohort entry |
| Drugs used in diabetes                                                                                                                                                                                                                                                                            | MA10                                                               | Any time before cohort entry |
| Drugs for obstructive airway diseases                                                                                                                                                                                                                                                             | MR03                                                               | Any time before cohort entry |



**Supplementary Table 4.** Risk of infection, hospitalisation and death associated with immunosuppressive therapy in vaccinated patients with immune-mediated inflammatory diseases.

|                                  | Exposed |        |                               |        | Unexposed |        |                               |        | Crude HR<br>(95% CI) *** | Weighted HR<br>(95% CI) *** |
|----------------------------------|---------|--------|-------------------------------|--------|-----------|--------|-------------------------------|--------|--------------------------|-----------------------------|
|                                  | Total   | Events | Incidence rate<br>(95% CI) ** | PY     | Total     | Events | Incidence rate<br>(95% CI) ** | PY     |                          |                             |
| <b>COVID-19 Infection*</b>       |         |        |                               |        |           |        |                               |        |                          |                             |
| IBD                              | 10 477  | 287    | 54.7<br>(48.7-61.4)           | 5 246  | 46 974    | 885    | 42.5<br>(39.8-45.4)           | 20 809 | 1.7<br>(1.5-1.9)         | 1.6<br>(1.4-1.9)            |
| Arthropathy                      | 24 255  | 476    | 40.3<br>(36.8-44.1)           | 11 822 | 44 650    | 800    | 37.8<br>(35.3-40.6)           | 21 140 | 1.3<br>(1.1-1.4)         | 1.3<br>(1.1-1.4)            |
| Psoriasis                        | 5 023   | 103    | 45.3<br>(37.4-55.00)          | 2 273  | 20 995    | 392    | 41.5<br>(37.6-45.8)           | 9 441  | 1.1<br>(0.9-1.4)         | 1.1<br>(0.9-1.4)            |
| Combined cohorts                 | 39 755  | 866    | -                             | 19 341 | 112 619   | 2 077  | -                             | 51 390 | 1.4<br>(1.3-1.5)         | 1.4<br>(1.2-1.5)            |
| <b>COVID-19 Hospitalization*</b> |         |        |                               |        |           |        |                               |        |                          |                             |
| IBD                              | 10 477  | 15     | 2.8<br>(1.7-4.7)              | 5 280  | 46 980    | 43     | 2.1<br>(1.5-2.8)              | 20 892 | 2.8<br>(1.5-5.1)         | 2.1<br>(1.0-4.1)            |
| Arthropathy                      | 24 256  | 37     | 3.1<br>(2.3-4.3)              | 11 873 | 44 650    | 59     | 2.8<br>(2.2-3.6)              | 21 215 | 1.3<br>(0.9-2.0)         | 1.3<br>(0.9-2.0)            |
| Psoriasis                        | 5 023   | <5     | -                             | 2 284  | 20 999    | 20     | 2.1<br>(1.4-3.3)              | 9 479  | 0.5<br>(0.1-2.3)         | 0.6<br>(0.1-2.5)            |
| Combined cohorts                 | 39 756  | <57    | -                             | 19 437 | 112 629   | 122    | -                             | 51 594 | 1.6                      | 1.4                         |

|                                                                                                                                                                                                                                       |        |     |                   |        |         |     |                  |        | (1.1-2.2)        | (1.0-2.0)        |
|---------------------------------------------------------------------------------------------------------------------------------------------------------------------------------------------------------------------------------------|--------|-----|-------------------|--------|---------|-----|------------------|--------|------------------|------------------|
| <b>Death*</b>                                                                                                                                                                                                                         |        |     |                   |        |         |     |                  |        |                  |                  |
| IBD                                                                                                                                                                                                                                   | 10 477 | <5  | -                 | 5 281  | 46 980  | 6   | 0.3<br>(0.1-0.6) | 20 897 | 1.1<br>(0.1-9.7) | 0.4<br>(0-5.6)   |
| Arthropathy                                                                                                                                                                                                                           | 24 256 | 6   | 0.51<br>(0.2-1.1) | 11 875 | 44 650  | 13  | 0.6<br>(0.4-1.1) | 21 222 | 1.0<br>(0.4-2.7) | 1.0<br>(0.4-2.6) |
| Psoriasis                                                                                                                                                                                                                             | 5 023  | 0   | -                 | 2 284  | 20 999  | <5  | -                | 9 480  | -                | -                |
| Combined cohorts                                                                                                                                                                                                                      | 39 756 | <11 | -                 | 19 440 | 112 629 | <24 | -                | 51 599 | 1.0<br>(0.4-2.5) | 0.9<br>(0.4-2.2) |
| Abbreviations: CI = confidence interval; HR = hazard ratio; IBD= inflammatory bowel disease; PY = person-years.                                                                                                                       |        |     |                   |        |         |     |                  |        |                  |                  |
| *COVID19- Infection = confirmed positive antigen or PCR test result for SARS-CoV2; COVID-19 Hospital Admission = Hospitalisation with SARS-CoV2 infection as primary diagnosis code; Death within 60 days of positive SARS-CoV2 test. |        |     |                   |        |         |     |                  |        |                  |                  |
| **Events/1000 PY (95% CI)                                                                                                                                                                                                             |        |     |                   |        |         |     |                  |        |                  |                  |
| *** Sex and age adjusted crude and weighted hazard ratios                                                                                                                                                                             |        |     |                   |        |         |     |                  |        |                  |                  |

**Supplementary Table 5.** Risk of COVID-19 infection associated with immunosuppressive therapy in vaccinated patients with immune-mediated inflammatory diseases at 0-3 months, 3-6 months, and 6-11 months post-vaccination.

|                                                       | Exposed |        |                             |        | Unexposed |        |                             |        | Crude HR<br>(95% CI)** | Weighted HR<br>(95% CI)** |
|-------------------------------------------------------|---------|--------|-----------------------------|--------|-----------|--------|-----------------------------|--------|------------------------|---------------------------|
|                                                       | Total   | Events | Incidence rate<br>(95% CI)* | PY     | Total     | Events | Incidence rate<br>(95% CI)* | PY     |                        |                           |
| <b>COVID-19 infection 0-3 months post-vaccination</b> |         |        |                             |        |           |        |                             |        |                        |                           |
| IBD                                                   | 10 477  | 57     | 22.2<br>(17.1-28.8)         | 2 570  | 46 974    | 196    | 17.0<br>(14.8-19.5)         | 11 546 | 1.6<br>(1.2-2.2)       | 1.5<br>(1.1-2.2)          |
| Arthropathy                                           | 24 255  | 96     | 16.1<br>(13.2-19.6)         | 5 978  | 44 650    | 166    | 15.1<br>(13.0-17.6)         | 10 990 | 1.3<br>(1.0-1.7)       | 1.3<br>(1.0-1.7)          |
| Psoriasis                                             | 5 023   | 24     | 19.4<br>(13.0-29.0)         | 1 236  | 20 995    | 83     | 16.1<br>(13.0-19.9)         | 5 163  | 1.3<br>(0.3-2.1)       | 1.3<br>(0.8-2.1)          |
| Combined cohorts                                      | 39 755  | 177    | -                           | 4 403  | 112 619   | 445    | -                           | 27 699 | 1.4<br>(1.2-1.7)       | 1.4<br>(1.1-1.6)          |
| <b>COVID-19 infection 3-6 months post-vaccination</b> |         |        |                             |        |           |        |                             |        |                        |                           |
| IBD                                                   | 10 010  | 123    | 45.8<br>(38.4-54.7)         | 2 683  | 45 202    | 526    | 56.8<br>(52.1-61.8)         | 9 266  | 0.9<br>(0.8-1.2)       | 1.0<br>(0.8-1.2)          |
| Arthropathy                                           | 23 503  | 284    | 48.6<br>(43.2-54.5)         | 5 849  | 43 186    | 482    | 47.5<br>(43.4-51.9)         | 10 149 | 1.2<br>(1.1-1.4)       | 1.2<br>(1.1-1.4)          |
| Psoriasis                                             | 4 860   | 63     | 60.7<br>(47.4-77.7)         | 1 038  | 20 203    | 233    | 54.5<br>(47.9-61.9)         | 4 279  | 1.1<br>(0.8-1.4)       | 1.0<br>(0.8-1.4)          |
| Combined cohorts                                      | 38 373  | 470    | -                           | 19 437 | 108 591   | 1 241  | -                           | 23 694 | 1.1<br>(1.0-1.2)       | 1.1<br>(1.0-1.3)          |

| <b>COVID-19 infection 6-11 months post-vaccination</b>                                                          |        |     |                        |       |        |     |                       |       |                  |                   |
|-----------------------------------------------------------------------------------------------------------------|--------|-----|------------------------|-------|--------|-----|-----------------------|-------|------------------|-------------------|
| IBD                                                                                                             | 6 058  | 107 | 160.6<br>(132.9-194.1) | 666   | 15 742 | 163 | 107.1<br>(91.9-124.9) | 1 522 | 1.3<br>(0.9-1.7) | 1.4<br>(1.1-1.9)  |
| Arthropathy                                                                                                     | 12 223 | 96  | 82.7<br>(67.7-101.0)   | 1 160 | 19 839 | 152 | 80.8<br>(68.9-94.7)   | 1 881 | 1.1<br>(0.8-1.4) | 1.1<br>(0.8-1.4)  |
| Psoriasis                                                                                                       | 1 719  | 16  | 93.8<br>(57.5-153.1)   | 170   | 7 444  | 76  | 109.8<br>(87.7-137.5) | 691   | 0.9<br>(0.5-1.5) | 0.9<br>(0.5-1.5)  |
| Combined cohorts                                                                                                | 20 000 | 219 | -                      | 1 996 | 43 025 | 391 | -                     | 4 094 | 1.1<br>(0.9-1.3) | 1.11<br>(0.9-1.3) |
| Abbreviations: CI = confidence interval; HR = hazard ratio; IBD= inflammatory bowel disease; PY = person-years. |        |     |                        |       |        |     |                       |       |                  |                   |
| *Events/1000 PY                                                                                                 |        |     |                        |       |        |     |                       |       |                  |                   |
| **Sex and age adjusted crude and weighted hazard ratios                                                         |        |     |                        |       |        |     |                       |       |                  |                   |

**Supplementary Table 6.** Risk of COVID infection associated with immunosuppressive therapy in vaccinated patients with immune-mediated inflammatory diseases by calendar period (1<sup>st</sup> January-31<sup>st</sup> November 2021)

|                                                                                              | Exposed |        | Unexposed |        | Hazard Ratio (HR) |                         |
|----------------------------------------------------------------------------------------------|---------|--------|-----------|--------|-------------------|-------------------------|
|                                                                                              | Total   | Events | Total     | Events | Crude HR (95% CI) | Weighted HR (95% CI) ** |
| <b>*COVID-19 infection from 1<sup>st</sup> January to 30<sup>th</sup> April</b>              |         |        |           |        |                   |                         |
| IBD                                                                                          | 5 745   | n<5    | 10 306    | 7      | 0.67 (0.17-2.61)  | 0.39 (0.09-1.71)        |
| Arthropathy                                                                                  | 9 646   | 9      | 13 044    | 17     | 0.75 (0.33-1.69)  | 0.78 (0.35-1.71)        |
| Psoriasis                                                                                    | 1 298   | n<5    | 4 512     | 6      | 2.00 (0.50-8.02)  | 1.98 (0.48-8.19)        |
| Combined IMID                                                                                | 16 689  | <19    | 27 862    | 30     | 0.87 (0.48-1.59)  | 0.83 (0.44-1.54)        |
| <b>COVID-19 infection 1<sup>st</sup> May to 31<sup>st</sup> August</b>                       |         |        |           |        |                   |                         |
| IBD                                                                                          | 10 141  | 56     | 45 486    | 121    | 1.61 (1.17-2.22)  | 1.19 (0.82-1.73)        |
| Arthropathy                                                                                  | 23 885  | 74     | 43 457    | 116    | 1.08 (0.81-1.45)  | 1.07 (0.79-1.43)        |
| Psoriasis                                                                                    | 4 912   | 12     | 20 337    | 53     | 0.88 (0.47-1.65)  | 0.84 (0.44-1.58)        |
| Combined IMID                                                                                | 38 938  | 142    | 109 280   | 290    | 1.24 (1.01-1.52)  | 1.08 (0.87-1.34)        |
| <b>COVID-19 infection 1<sup>st</sup> September to 30<sup>st</sup> November</b>               |         |        |           |        |                   |                         |
| IBD                                                                                          | 1 0349  | 228    | 46 590    | 757    | 1.69 (1.45-1.97)  | 1.74 (1.48-2.04)        |
| Arthropathy                                                                                  | 23 898  | 393    | 44 079    | 667    | 1.34 (1.18-1.51)  | 1.33 (1.17-1.51)        |
| Psoriasis                                                                                    | 4 974   | 88     | 20 803    | 333    | 1.17 (0.93-1.48)  | 1.13 (0.89-1.44)        |
| Combined IMID                                                                                | 39 221  | 709    | 111 472   | 1757   | 1.42 (1.30-1.55)  | 1.42 (1.29-1.56)        |
| Abbreviations: CI = confidence interval; HR = hazard ratio; IBD= inflammatory bowel disease. |         |        |           |        |                   |                         |
| *COVID19- Infection = confirmed positive antigen or PCR test result for SARS-CoV2            |         |        |           |        |                   |                         |
| ** Sex and age adjusted crude and weighted hazard ratios                                     |         |        |           |        |                   |                         |

**Supplementary Table 7.** Risk of infection, hospitalisation and death associated with immunosuppressive therapy in vaccinated patients with immune-mediated inflammatory diseases by immunosuppressive drug class.

|                                        | Exposed |        |        |                           | Unexposed |        |        |                           | Crude HR (95% CI)*** | Weighted HR (95% CI)*** |
|----------------------------------------|---------|--------|--------|---------------------------|-----------|--------|--------|---------------------------|----------------------|-------------------------|
|                                        | Total   | Events | PY     | Incidence rate (95% CI)** | Total     | Events | PY     | Incidence rate (95% CI)** |                      |                         |
| <b>COVID-19 Infection*</b>             |         |        |        |                           |           |        |        |                           |                      |                         |
| Selective Immunosuppressants           | 3 384   | 68     | 1 846  | 39.4<br>(31.0-49.9)       | 151 936   | 2 079  | 51 334 | 40.5<br>(38.8-42.3)       | 1.3<br>(1.0-1.7)     | 1.3<br>(1.0-1.6)        |
| Tumour Necrosis Factor Inhibitors      | 14 277  | 418    | 6 908  | 62.5<br>(56.7-68.7)       | 140 797   | 2 070  | 51 355 | 40.3<br>(38.6-42.1)       | 1.8<br>(1.6-2.0)     | 1.8<br>(1.6-2.0)        |
| Interleukin Inhibitors                 | 2 781   | 52     | 1 385  | 40.1<br>(30.6-52.7)       | 152 584   | 2 082  | 51 352 | 40.5<br>(38.8-42.3)       | 1.1<br>(0.8-1.4)     | 1.0<br>(0.8-1.4)        |
| Calcineurin Inhibitors                 | 154     | n<5    | 129    | -                         | 155 309   | 2 073  | 51 298 | 40.4<br>(38.7-42.2)       | 1.3<br>(0.3-5.2)     | 0.5<br>(0.2-1.5)        |
| Systemic Corticosteroids               | 5 504   | 97     | 2 991  | 34.6<br>(28.4-42.3)       | 149 667   | 2 079  | 51 503 | 40.4<br>(38.7-42.1)       | 1.3<br>(1.0-1.6)     | 1.2<br>(1.0-1.5)        |
| Rituximab and Other Immunosuppressants | 21 038  | 426    | 10 703 | 41.2<br>(37.5-45.3)       | 112 593   | 2 075  | 51 409 | 40.4<br>(38.7-42.1)       | 1.3<br>(1.2-1.4)     | 1.3<br>(1.1-1.4)        |
| <b>COVID-19 Hospitalization*</b>       |         |        |        |                           |           |        |        |                           |                      |                         |
| Selective Immunosuppressants           | 3 384   | 7      | 1 735  | 4.0<br>(1.9-8.5)          | 112 479   | 122    | 51 531 | 2.4<br>(2.0-2.8)          | 3.0<br>(1.4-6.5)     | 2.2<br>(1.0-5.2)        |
| Tumour Necrosis Factor Inhibitors      | 14 277  | 16     | 6 740  | 2.4<br>(1.5-3.9)          | 112 506   | 116    | 51 551 | 2.3<br>(1.9-2.1)          | 2.0<br>(1.2-3.3)     | 1.8<br>(1.0-3.3)        |

|                                        |        |     |        |                   |         |     |           |                  |                  |                  |
|----------------------------------------|--------|-----|--------|-------------------|---------|-----|-----------|------------------|------------------|------------------|
| Interleukin Inhibitors                 | 2 781  | 0   | 1 302  | -                 | 112 445 | 125 | 51 549    | 2.4<br>(2.0-2.9) | -                | -                |
| Calcineurin Inhibitors                 | 154    | 0   | 83     | -                 | 112 404 | 122 | 51 493    | 2.4<br>(2.0-2.8) | -                | -                |
| Systemic Corticosteroids               | 5 504  | 18  | 2 811  | 6.4<br>(4.0-10.2) | 112 587 | 122 | 51 699    | 2.4<br>(2.0-2.8) | 2.4<br>(1.4-3.9) | 1.8<br>(1.0-3.0) |
| Rituximab and Other Immunosuppressants | 21 038 | 25  | 10 387 | 2.4<br>(1.6-3.6)  | 112 593 | 121 | 51 604    | 2.3<br>(2.0-2.8) | 1.2<br>(0.5-1.0) | 1.1<br>(0.7-1.8) |
| <b>Death*</b>                          |        |     |        |                   |         |     |           |                  |                  |                  |
| Selective Immunosuppressants           | 3 384  | 0   | 1 736  | -                 | 112479  | 23  | 51 545    | 0.5<br>(0.3-0.7) | -                | -                |
| Tumour Necrosis Factor Inhibitors      | 14 277 | 0   | 6 741  | -                 | 112506  | 19  | 5 1564    | 0.4<br>(0.2-0.6) | -                | -                |
| Interleukin Inhibitors                 | 2 781  | 0   | 1 302  | -                 | 112 445 | 24  | 51 564    | 0.5<br>(0.3-0.7) | -                | -                |
| Calcineurin Inhibitors                 | 154    | 0   | 83     | -                 | 112 404 | 24  | 51 507    | 0.5<br>(0.3-0.7) | -                | -                |
| Systemic Corticosteroids               | 5 504  | 6   | 2 812  | 2.1<br>(2.0-4.8)  | 112 587 | 23  | 51<br>713 | 0.4<br>(0.3-0.7) | 4.0<br>(1.6-9.9) | 2.3<br>(0.9-6.2) |
| Rituximab and Other Immunosuppressants | 21 038 | n<5 | 10 388 | -                 | 112 593 | 22  | 51<br>619 | 0.4<br>(0.3-0.7) | 0.5<br>(0.1-2.3) | 0.5<br>(0.1-2.4) |

Abbreviations: CI = confidence interval; HR = hazard ratio; IBD= inflammatory bowel disease; PY = person-years.

Immunosuppressive Drug Class: Selective Immunosuppressants, Tumour Necrosis Factor Inhibitors, Interleukin Inhibitors, Calcineurin Inhibitors, Systemic Corticosteroids, and Other Immunosuppressants including Rituximab (See Supplementary for complete ATC codes)

\*COVID19- Infection = confirmed positive antigen or PCR test result for SARS-CoV2; COVID-19 Hospital Admission = Hospitalisation with SARS-CoV2 infection as primary diagnosis code; Death within 60 days of positive SARS-CoV2 test.

\*\*Events/1000 PY

\*\*\* Sex and age adjusted crude and weighted hazard ratios



## SUPPLEMENTARY FIGURES

**Supplementary Figure 1.** Kaplan-Meier plots for probability of infection with COVID-19 following second mRNA vaccination in immunosuppressive exposed compared to propensity score matched immunosuppressive unexposed a. IBD patients b. Arthropathy patients c. Psoriasis patients over the calendar year from January 1<sup>st</sup> to 31<sup>st</sup> November 2021. SMR weighted = standardized mortality ratio weighted.

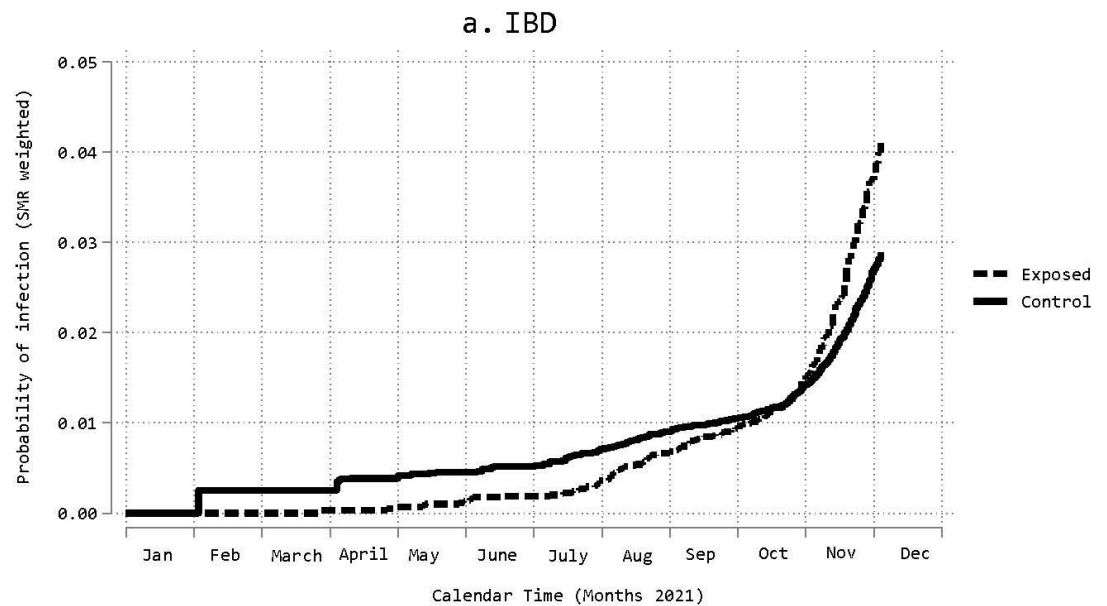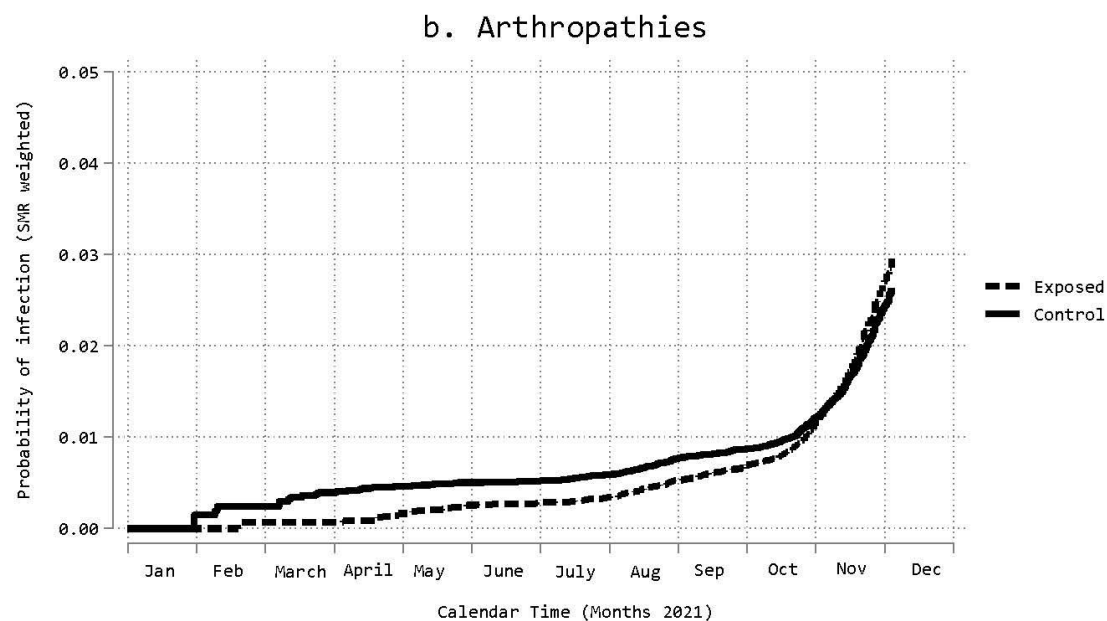

### c. Psoriasis

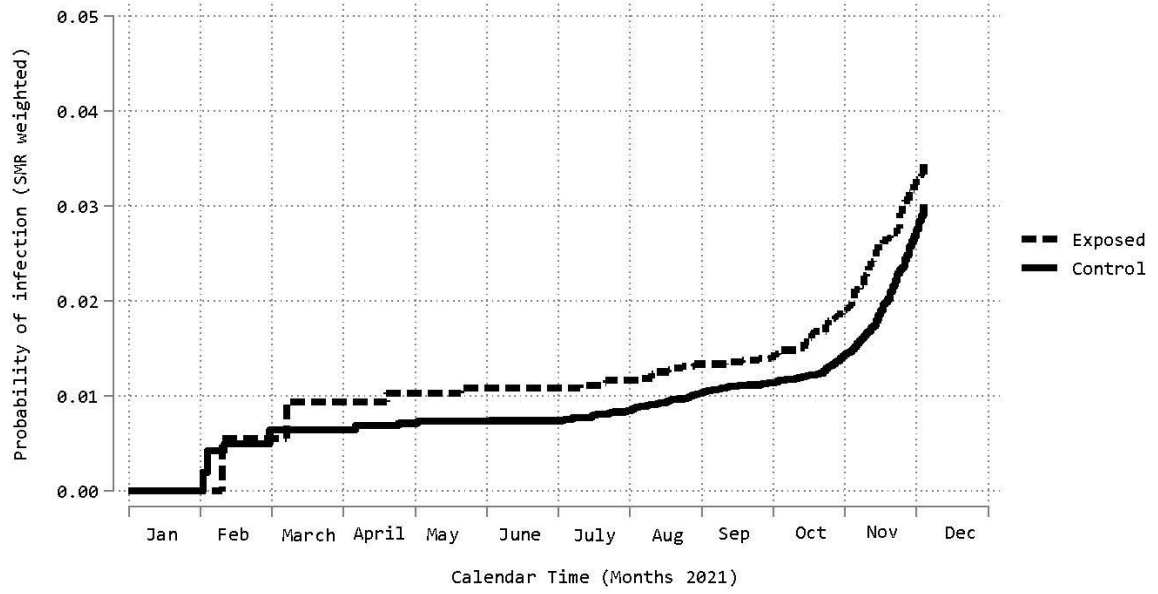

Supplement: bmjopen-2023-077408supp001.pdf [file bmjopen-2023-077408supp001.pdf]
